# Supplementary material for: Tetrazole-based infinite coordination polymer for encapsulation of TiO2 and its potential application for fabrication of ZnO@TiO2 core–shell structures
Source: Royal Society of Chemistry journal article supplement (doi:10.1039/c5ra06093a), 2015-01-01
Supplement: c5ra06093a1.pdf [file c5ra06093a1.pdf]

## Electronic Supplementary Information (ESI)

For

### Tetrazole-based infinite coordination polymer for encapsulation of TiO<sub>2</sub> and its potential application for fabrication of ZnO@TiO<sub>2</sub> core-shell structures

Sedigheh Abedi, and Ali Morsali\*

Department of Chemistry, Faculty of Sciences, Tarbiat Modares University, P.O. Box 14115-175, Tehran, Islamic Republic of Iran.

#### 1. Synthesis details and characterization of the btb ligand

**Fig. S1** Infrared spectrum of btb ligand.

**Fig. S2** Mass data of btb ligand.

**Fig. S3** <sup>1</sup>H NMR spectrum of btb

**Fig. S4** <sup>13</sup>C NMR spectrum of btb

#### 2. Synthesis details of TiO<sub>2</sub> linked RB in hollow Zn(btb) spheres (RB/TiO<sub>2</sub>@Zn(btb))

**Fig. S5** Infrared Spectrum of Zn(btb) spheres

**Fig. S6** Infrared Spectrum of RB/TiO<sub>2</sub>@Zn(btb) spheres

**Fig. S7** HRTEM images of (a) the bare Zn(btb) spheres, (b) RB/TiO<sub>2</sub> encapsulated within the spherical Zn(btb), RB/TiO<sub>2</sub>@Zn(btb).

**Fig. S8** EDX analysis (of SEM images) of RB/TiO<sub>2</sub>@Zn(btb), and calcined RB/TiO<sub>2</sub>@Zn(btb) spheres at 400 °C

## **Characterization**

The elemental analysis was performed with a Heraeus CHN-O- rapid analyzer. Infrared (IR) spectra were performed on a Perkin–Elmer 597 and Nicolet 510P spectrophotometers. The thermal behavior was measured with a PL-STA 1500 apparatus between 35 and 600 °C in a static atmosphere of nitrogen. X-ray powder diffraction (XRD) measurements were performed using a X’pert diffractometer manufactured by Philips with monochromatized CuK $\alpha$  radiation. The samples were characterized with a scanning electron microscope (SEM) (Philips XL 30) with a gold coating. Transmission electron microscopy (TEM) images were obtained with a Hitachi H-9500 apparatus. NMR data were collected by a BRUKER DRX500 AVANCE. An ultrasonic bath (Tecna 6; 50– 60 Hz and 0.138 kW) was used for the ultrasonic irradiation. PL spectra were measured by means of a spectrofluorimeter manufactured by Cary eclipseFL0912M014. Dynamic light scattering measurements of particle sizes were determined by means of a Zetasizer Nano equipment.

## 1. Synthesis details and characterization of the ligand btb

**Synthesis of btb.** To a 250 mL round-bottomed flask was added the nitrile (20 mmol), sodium azide (60 mmol), zinc bromide (20 mmol), and 40 mL of water. The reaction mixture was refluxed for 48 h at 270°C; vigorous stirring is essential. After cooling to room temperature, HCl (3 N, 30 mL) were added, and vigorous stirring was continued until the aqueous layer had a pH of 1. 200 mL of 0.25 N NaOH was added, and the mixture stirred for 30 min, until the original precipitate was dissolved and a suspension of zinc hydroxide was formed. The suspension was filtered, and the solid washed with 20 mL of 1 N NaOH. To the filtrate was added 40 mL of 3 N HCl with vigorous stirring causing the tetrazole to precipitate. The tetrazole was filtered and washed with HCl and dried in a drying oven to furnish the tetrazole as a white or slightly colored powder. The product had the following data: mp 269-270 °C.

<sup>1</sup>H NMR (d -DMSO): 7.27 (t, 1H), 7.25 (b, 1H), 7.24 (b, 1H), 7.17 (m, 3H), 4.2 (s, 4H),

<sup>13</sup>C NMR: 173, 155, 136.5, 129.16, 127.9, 29.60.

Anal. Calcd. for btb: C, 49.57; H, 4.13; N, 46.28. Found: C, 49.12; H, 4.04; N, 43.86.

**Figure S1.** IR spectra of btb

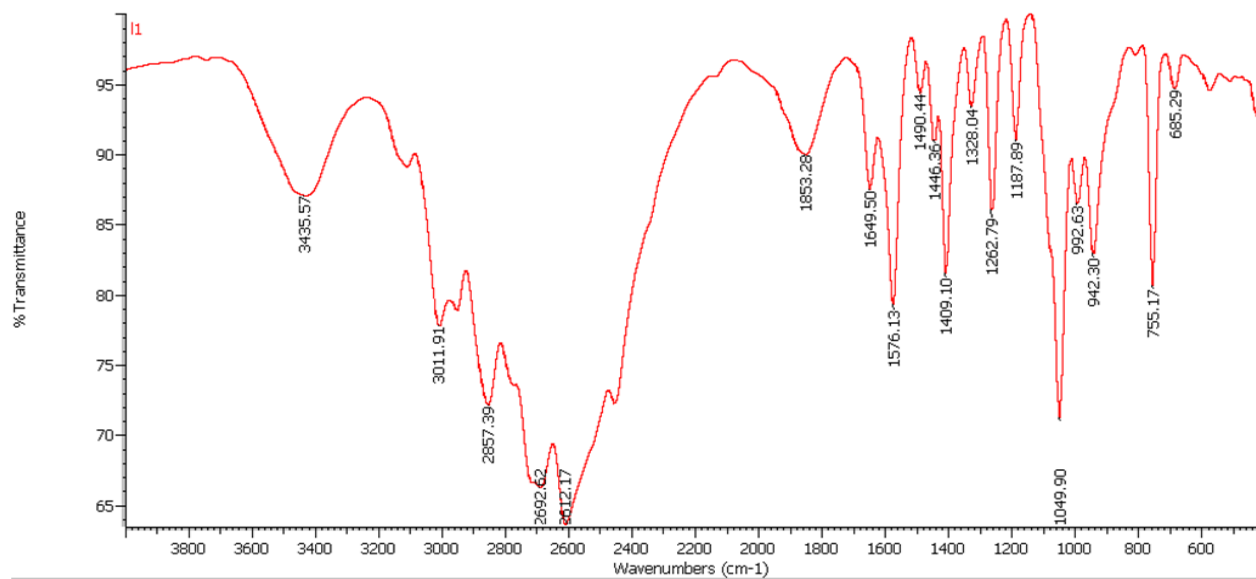

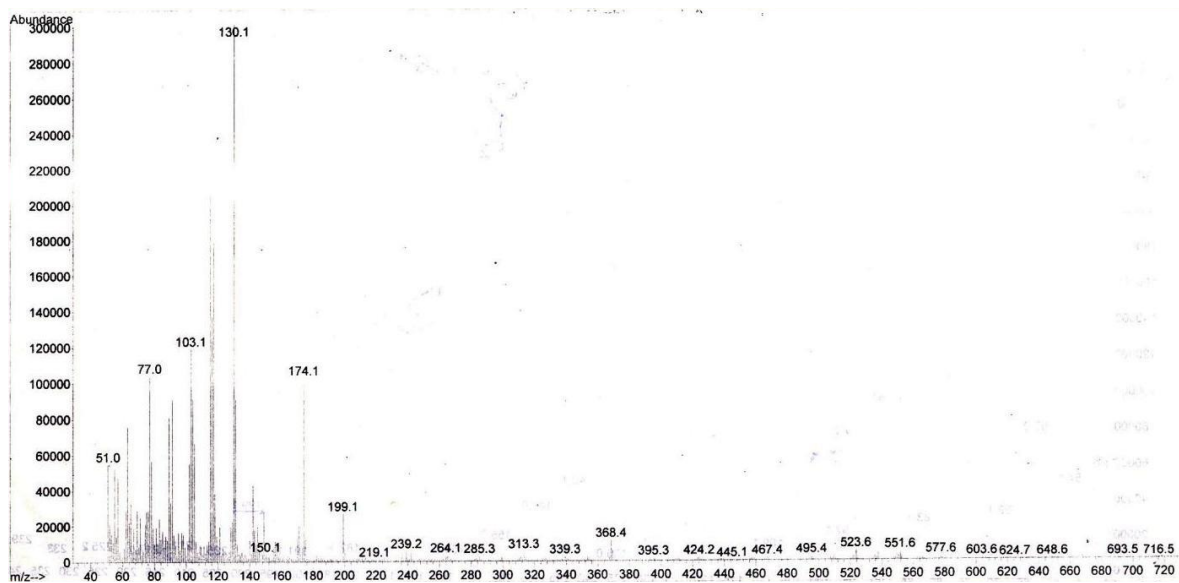

**Figure S2.** Mass data of the ligand, btb

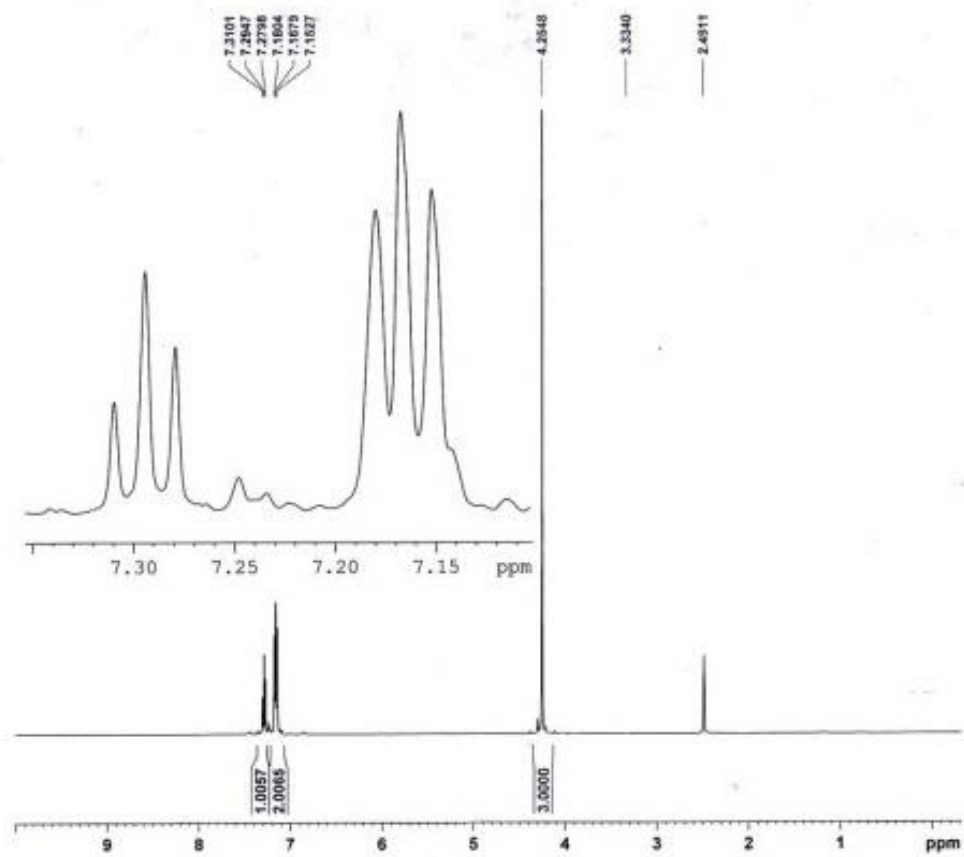

**Figure S3.**  $^1\text{H}$  NMR spectra of the ligand, btb, (the peak in 2.5 ppm, is for solvent DMSO)

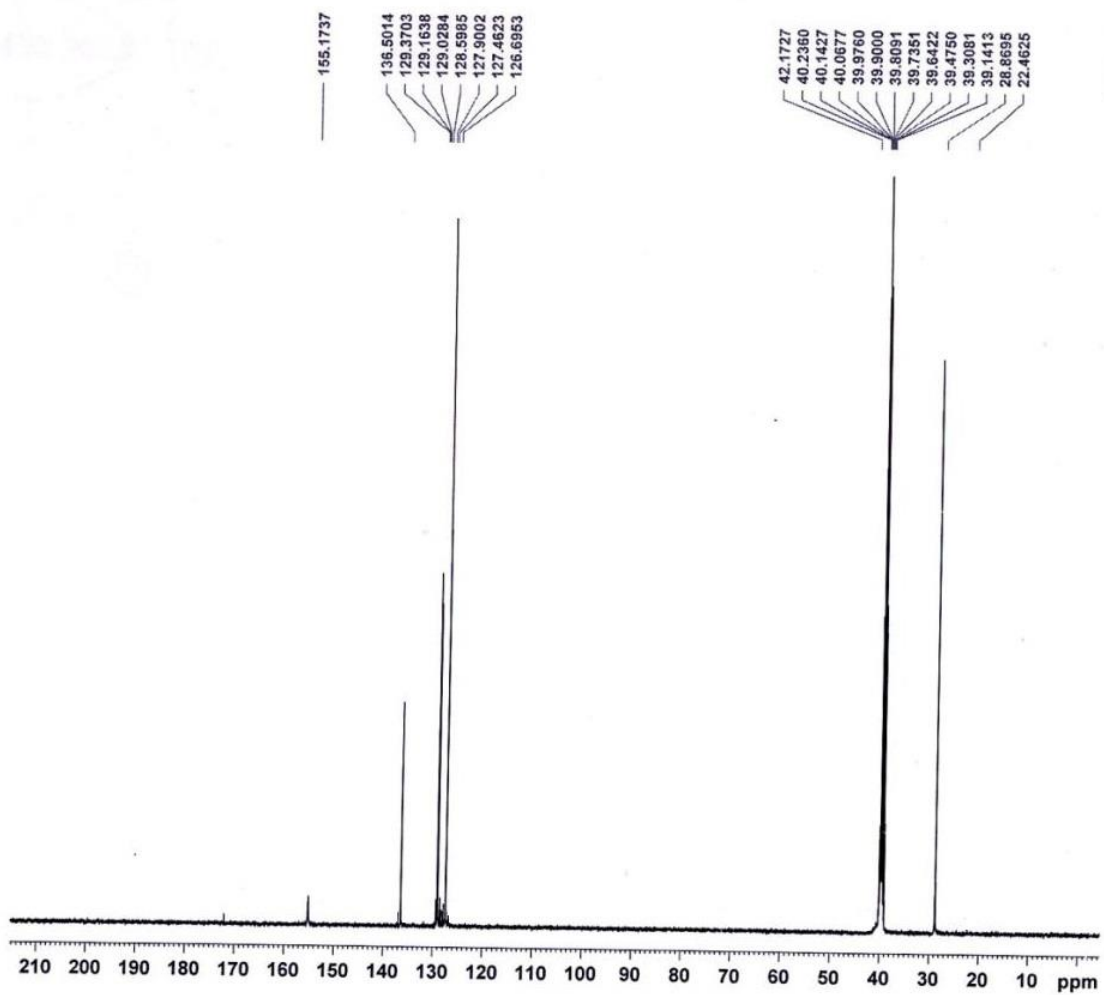

**Figure S4.** <sup>13</sup>C NMR spectra of the ligand, btb

## 2. Synthesis details of TiO<sub>2</sub> linked RB in hollow Zn(btb) spheres (RB/TiO<sub>2</sub>@Zn(btb))

In a typical experiment, a mixture of btb (242 mg, 1 mmol) in DMF (40 ml), Rodamine B (20 µl, 200 ppm) and TiO<sub>2</sub> (1-3 mg, Degussa P25) was prepared. The mixture was homogenized by sonication and stirred for specific times (30 min-12 h) at room temperature. After overnight stirring, a methanolic solution (10 mL) of Zn(NO<sub>3</sub>)<sub>2</sub>·6H<sub>2</sub>O (296 mg, 1 mmol) was added, to generate the nano-micro spheres encapsulate TiO<sub>2</sub> containing-dye nanoparticles. The resulting encapsulated metal-organic systems in all these cases were purified by centrifugation and washed three times with DMF, and redispersed in DMF to obtain the corresponding colloidal solutions was named **RB/TiO<sub>2</sub>@Zn(btb)**. The product had the following data: mp >300 °C. Anal. Calcd. for H Zn(btb): C, 39.34; H, 2.62; N, 36.74. Found: C, 38.65; H, 2.97; N, 31.30.



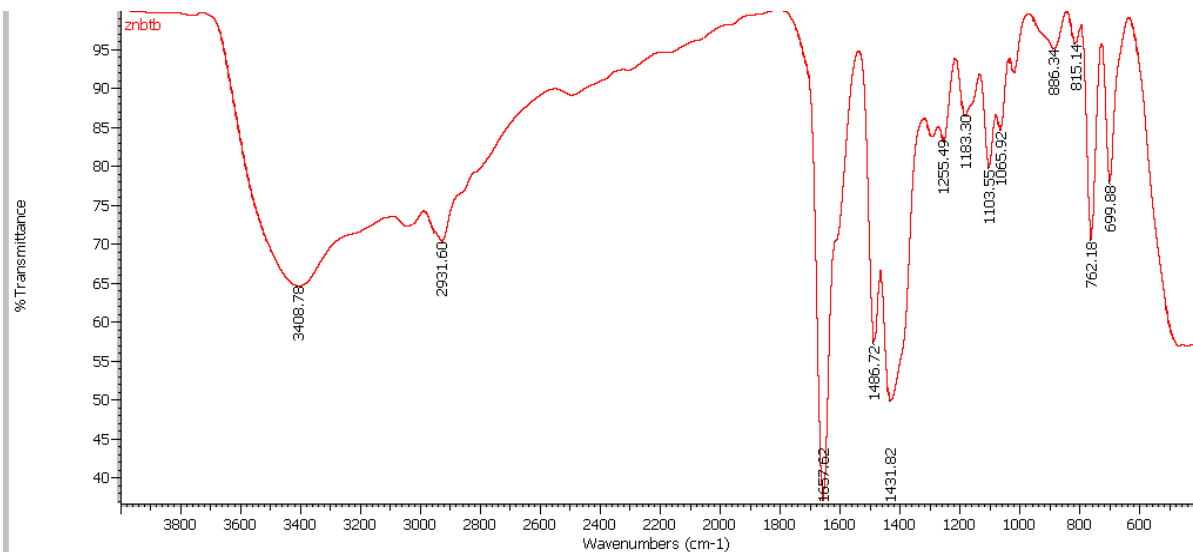

**Figure S5.** IR spectrum of Zn(bt)

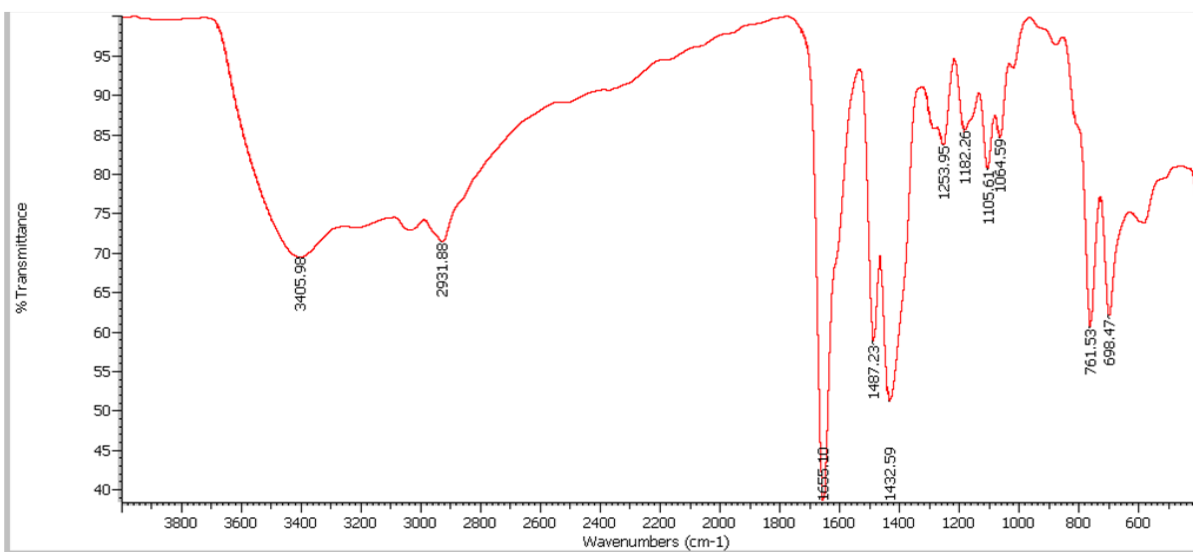

**Figure S6.** IR spectrum of RB/TiO<sub>2</sub>@Zn(bt)

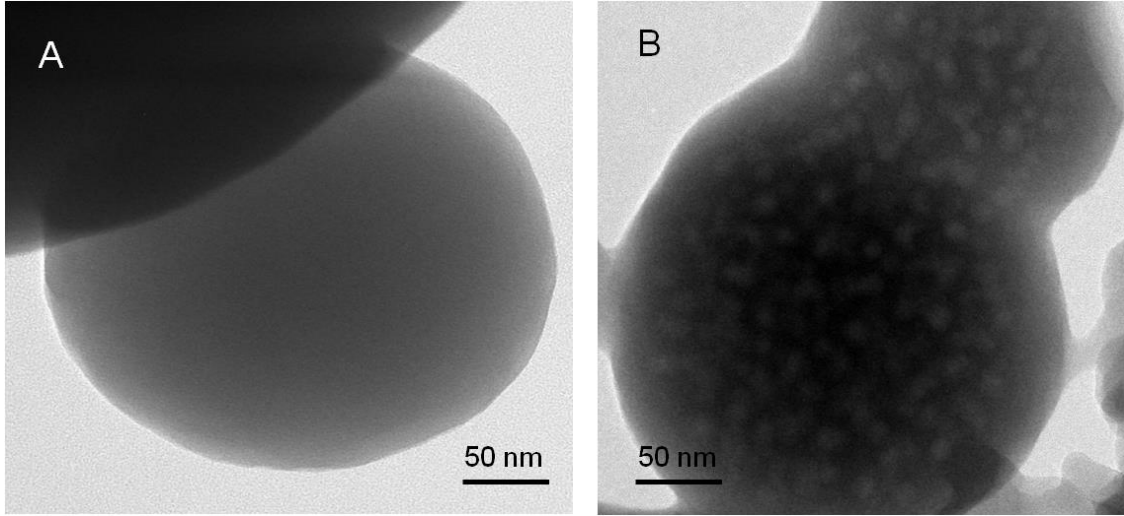

**Figure S7.** HRTEM images of (a) the bare Zn(bt<sub>b</sub>) spheres, (b) RB/TiO<sub>2</sub> encapsulated within the spherical Zn(bt<sub>b</sub>), RB/TiO<sub>2</sub>@Zn(bt<sub>b</sub>).

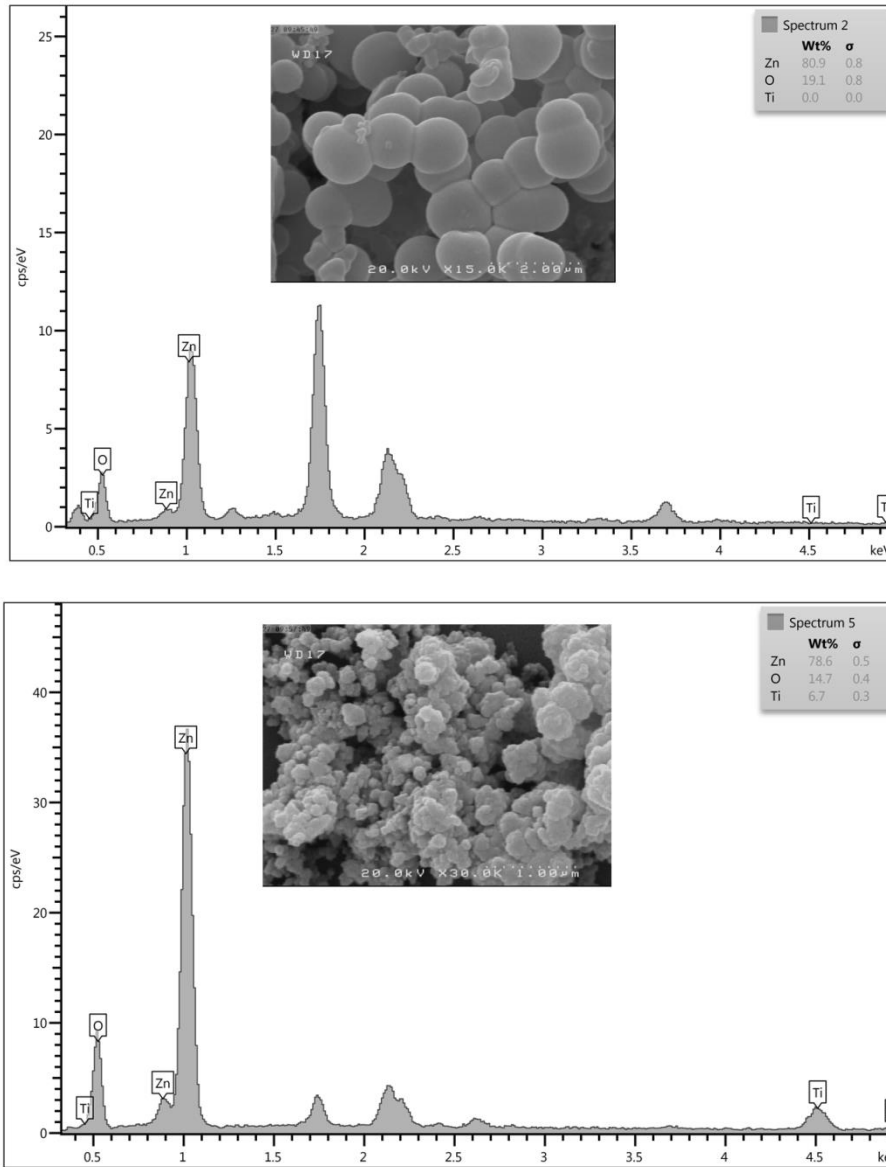

**Figure S8.** EDX analysis (of SEM images) of RB/TiO<sub>2</sub>@Zn(bt) (up), and calcined RB/TiO<sub>2</sub>@Zn(bt) spheres at 400 °C, 3h (down): The zero content of Ti species in EDX of RB/TiO<sub>2</sub>@Zn(bt) indicates entrance of titania species within the Zn(bt) spheres that slightly coming out of the polymeric spheres after calcination at 400 °C.
